# Supplementary material for: Prediction models for diagnosis and prognosis of covid-19: systematic review and critical appraisal
Source: BMJ. 2020 Apr 7;369:m1328. doi: 10.1136/bmj.m1328 (PMC7222643; doi:10.1136/bmj.m1328)
Supplement: Supplementary file 1 — Web appendix: Supplementary material [file wynl056013_1.ww.pdf]

## **Supplementary material**

### **Systematic review and critical appraisal of prediction models for diagnosis and prognosis of COVID-19 infection**

#### **Contents:**

Search strings

Data extraction

Supplementary Table 1. Overview of the primary datasets used in included studies

Supplementary Table 2. Overview of modelling techniques for diagnosis and prognosis of COVID-19 infection

## **Supplementary material: search strings**

Search string bioRxiv, medRxiv, arXiv: ncov or corona or Wuhan or COVID

Search string PubMed: ("Wuhan coronavirus" [Supplementary Concept] OR "COVID-19" OR "2019 ncov"[tiab] OR (("novel coronavirus"[tiab] OR "new coronavirus"[tiab]) AND (Wuhan[tiab] OR 2019[tiab]))) OR 2019-nCoV[All Fields] OR (Wuhan[tiab] AND coronavirus[tiab])))

Search string EMBASE: ncov OR (Wuhan AND corona) OR COVID

## **Supplementary material: data extraction**

Data were extracted on the following items:

- Population (China, other).
- Intended timing of model use (screening of patients, ICU admission, etc.).
- Setting (inpatients, outpatients, suspected cases).
- Participants: study design, recruitment method, number of centres, inclusion criteria, exclusion criteria, patient age (mean and standard deviation or median and interquartile range), patient sex (n males and percentage).
- Predictors: list of candidate predictors, number of candidate predictors, number of additional degrees of freedom for candidate predictors (e.g. for categorical variables with more than two categories or for modelling continuous variables non-linearly), predictors in the final model, number of predictors in the final model, number of additional degrees of freedom in the final model.
- Outcome: definition of outcome, timing of outcome.
- Analysis:
  - Total number of participants, total number of participants with the outcome.
  - Total number of participants with any missing predictor or outcome values.
  - Method for handling missing data.
  - Method for prediction model development (logistic regression, Cox regression, neural network, tree-based, etc.).
  - Method for selection of predictors during multivariable analysis and the criteria used (e.g., p-value used for selection).
  - Handling of categorical and continuous variables.
  - Method(s) for validation (e.g. apparent, internal or external) and for optimism adjustment.
  - Performance measures (calibration, discrimination, other) resulting from validation.
  - Model presentation (coefficients and confidence intervals, final model, alternative presentation formats of the model such as a web-based tool).

- Standard signalling questions and items to assess risk of bias according to PROBAST (Moons, Wolff, et al.), on four domains:

- participants
- predictors
- outcome
- analysis

If risk of bias was high in at least one of the subdomains, overall risk of bias was judged high, as per PROBAST guidance (Moons, Wolff, et al.).

**Supplementary Table 1.** Overview of the primary datasets used in included studies.

|                                                 | Authors                   | Description of dataset                                                                                                                                                                                                     | Study design           | Age mean $\pm$ se, median (IQR), or range                                                                                                             | Sex (% male)                                                                                      |
|-------------------------------------------------|---------------------------|----------------------------------------------------------------------------------------------------------------------------------------------------------------------------------------------------------------------------|------------------------|-------------------------------------------------------------------------------------------------------------------------------------------------------|---------------------------------------------------------------------------------------------------|
| <b>Hospital admission in general population</b> |                           |                                                                                                                                                                                                                            |                        |                                                                                                                                                       |                                                                                                   |
|                                                 | DeCaprio, Gartner, et al. | Medicare claims data 2015 to 2016                                                                                                                                                                                          | Administrative records | $\geq 18$                                                                                                                                             | Unclear                                                                                           |
| <b>Diagnosis</b>                                |                           |                                                                                                                                                                                                                            |                        |                                                                                                                                                       |                                                                                                   |
|                                                 | Feng, Huang, et al.       | First medical centre, Chinese People's Liberation Army General Hospital, January 14 to February 9 (development) and February 10 to February 26 (validation)                                                                | Retrospective cohort   | 34 (IQR 29 to 42)                                                                                                                                     | 56%                                                                                               |
|                                                 | Lopez-Rincon, et al.      | International repository of genome sequences from the China National Centre for Bioinformation (bigd.big.ac.cn/ncov), using all available samples on March 15                                                              | Unclear                | Unclear                                                                                                                                               | Unclear                                                                                           |
|                                                 | Meng, Wang, et al.        | Various regional medical institutions in China, between December 20 to February 10                                                                                                                                         | Nonnested case-control | Dev.: control: 68.5 (IQR 77 to 81), case: 46 (55 to 73); val.: control: 66 (IQR 76 to 84), case: 48 (58 to 67)                                        | Dev.: control: 73%, case: 69%; val.: control: 69%, case: 69%                                      |
|                                                 | Song, Xu, et al.          | Zhijiang District of the First Affiliated Hospital of Zhejiang University School of Medicine                                                                                                                               | Unclear                | 38 (IQR 30 to 55)                                                                                                                                     | 49%                                                                                               |
|                                                 | Yu, Shao, et al.          | Wuhan's Children's Hospital, February 1 to March 3                                                                                                                                                                         | Retrospective cohort   | 0 to 15 (range)                                                                                                                                       | 61%                                                                                               |
| <i>Update 1:</i>                                |                           |                                                                                                                                                                                                                            |                        |                                                                                                                                                       |                                                                                                   |
|                                                 | Li, Fang, et al.          | Hospital data from Zhuhai, China, January 18 to February 7                                                                                                                                                                 | Unclear                | 45 $\pm$ 18                                                                                                                                           | 49%                                                                                               |
|                                                 | Martin, Nateqi, et al.    | Simulated data based on published case reports                                                                                                                                                                             | Unclear                | Unclear                                                                                                                                               | Unclear                                                                                           |
|                                                 | Sun, Koh, et al.          | National Centre for Infectious Diseases (NCIP), Singapore, January 26 to February 16                                                                                                                                       | Cross-sectional data   | 34 (median)                                                                                                                                           | 49%                                                                                               |
|                                                 | Wang, Weng, et al.        | Second Affiliated Hospital and Yuying Children's Hospital of Wenzhou Medical University, Wenzhou, China, January 25 to March 3                                                                                             | Retrospective cohort   | 50 (IQR 37 to 58)                                                                                                                                     | 52%                                                                                               |
|                                                 | Wu, Zhang, et al.         | Data from multiple sources, including Lanzhou Pulmonary Hospital, the First Hospital of Lanzhou University, Lanzhou University Second Hospital, the First People's Hospital of Lanzhou City, and Gansu Provincial Hospital | Unclear                | Case: 47 (IQR 33 to 64)<br>Control, pneumonia: 63 (IQR 47 to 75);<br>Control, tuberculosis: 54 (IQR 33 to 68);<br>Control, lung cancer: 61 (54 to 69) | Case: 48%<br>Control, pneumonia: 48%;<br>Control, tuberculosis: 60%;<br>Control, lung cancer: 76% |
|                                                 | Zhou, Yang, et al.        | Hospital of Wuhan, China, January 1 to February 28                                                                                                                                                                         | Retrospective cohort   | Dev.: case: 65 $\pm$ 15, control: 49 $\pm$ 16; val.: case: 66 $\pm$ 12, control 47 $\pm$ 15                                                           | Dev.: Case: 45%, Control 66%;<br>Val.: Case: 23%, Control: 36%                                    |
| <b>Diagnostic imaging</b>                       |                           |                                                                                                                                                                                                                            |                        |                                                                                                                                                       |                                                                                                   |
|                                                 | Barstugan, Ozkaya, et al. | Italian open data repository from the Societa Italiana di Radiologia Medica e Interventistica (sirm.org)                                                                                                                   | Unclear                | Unclear                                                                                                                                               | Unclear                                                                                           |

|  |                                |                                                                                                                                                                                                                                                                            |                        |                                                         |                              |
|--|--------------------------------|----------------------------------------------------------------------------------------------------------------------------------------------------------------------------------------------------------------------------------------------------------------------------|------------------------|---------------------------------------------------------|------------------------------|
|  | Chen, Wu, et al.*              | Renmin Hospital of Wuhan University                                                                                                                                                                                                                                        | Unclear                | Cases: 52 (IQR 38 to 69)<br>Controls: 48 (IQR 35 to 55) | Cases: 35%<br>Controls: 56%  |
|  | Gozes, Frid-Adar, et al.       | COVID cases: Wenzhou hospital (China), controls: chainz.cn registry, El Camino Hospital, California, LIDC registry (7 USA hospitals)                                                                                                                                       | Nonnested case-control | Unclear                                                 | Unclear                      |
|  | Jin, Chen, et al.              | Wuhan Union Hospital, Western Campus of Wuhan Union Hospital, Jiangnan Mobile Cabin Hospital Wuhan, January 11 to February 29 2020, LICD-IDRI registry from NCI, USA; ILD-HUG registry from University Hospitals of Geneva, Switzerland                                    | Unclear                | Unclear                                                 | Unclear                      |
|  | Jin, Wang, et al.              | Beijing Tsinghua Changgung Hospital, Wuhan No.7 Hospital, Zhongnan Hospital of Wuhan University, Tianyou Hospital Affiliated to Wuhan University of Science & Technology, Wuhan's Leishenshan Hospital, February 07 to February 20                                         | Unclear                | Unclear                                                 | Unclear                      |
|  | Li, Qin, et al.                | 6 Chinese hospitals, August 16 2016 to February 17 2020 (COVID-19 cases: December 31 2019 to February 17 2020)                                                                                                                                                             | Unclear                | 49 ± 15                                                 | 55%                          |
|  | Shan, Gao, et al.              | Shanghai Public Health Clinical Centre and other centers in Shanghai                                                                                                                                                                                                       | Unclear                | Unclear                                                 | High                         |
|  | Shi, Xia, et al.               | Tongji Hospital of Huazhong University of Science and Technology, Shanghai Public Health Clinical Centre of Fudan University, and China-Japan Union Hospital of Jilin University                                                                                           | Nonnested case-control | Cases: 49 ± 14 years<br>Controls: 56±14                 | Cases: 52%<br>Controls: 46%  |
|  | Wang, Kang, et al.             | Xi'an Jiaotong University First Affiliated Hospital, Nanchang University First Hospital and Xi'an No.8 Hospital of Xi'an Medical College                                                                                                                                   | Unclear                | Unclear                                                 | Unclear                      |
|  | Xu, Jiang, et al.              | First Affiliated Hospital of Zhejiang University, No. 6 People's Hospital of Wenzhou, No. 1 People's Hospital of Wenling, January 19 to February 14                                                                                                                        | Nonnested case control | Unclear                                                 | Unclear                      |
|  | Ying, Zheng, et al.            | Renmin Hospital of Wuhan University, Third Affiliated Hospital, Sun Yat-Sen Memorial Hospital                                                                                                                                                                              | Unclear                | Unclear                                                 | Unclear                      |
|  | Zheng, Deng, et al.            | Union Hospital, Tongji Medical College, Huazhong University of Science and Technology, December 13 to January 23                                                                                                                                                           | Retrospective cohort   | Cases: 51 ± 15,<br>control: 31 ± 10                     | Cases: 44%,<br>Controls: 38% |
|  | <i>Update 1:</i>               |                                                                                                                                                                                                                                                                            |                        |                                                         |                              |
|  | Abbas, Abdelsamea, et al.      | Images from an international Github image repository, and controls from the Japanese Society of Radiological Technology, dates unclear.                                                                                                                                    | Nonnested case-control | Unclear                                                 | Unclear                      |
|  | Apostolopoulos, Mpesiana.      | Images from Kaggle, including data from the Radiological Society of North America (RSNA), Radiopaedia, and the Italian Society of Medical and Interventional Radiology (SIRM), dates unclear. Controls are publically available images from China and the U.S (2013-2017). | Nonnested case-control | Unclear                                                 | Unclear                      |
|  | Bukhari, Bukhari et al.        | University of Montreal, Canada, and U.S.A. (locations unclear), dates unclear.                                                                                                                                                                                             | Unclear                | Dev.: 63 (IQR 57 to 71); Val. 61 (IQR 56 to 64)         | Dev.:51%; Val.: 53%          |
|  | Chaganti, Balachandran, et al. | Data from institutions in Europe, Canada, USA, dates unspecified.                                                                                                                                                                                                          | Nonnested case-control | Unclear                                                 | Unclear                      |

|                  |                            |                                                                                                                                                                                                                                                                                             |                        |                                                                                                              |                                                                  |
|------------------|----------------------------|---------------------------------------------------------------------------------------------------------------------------------------------------------------------------------------------------------------------------------------------------------------------------------------------|------------------------|--------------------------------------------------------------------------------------------------------------|------------------------------------------------------------------|
|                  | Chowdhury, Rahman et al.   | Various Italian centers, locations and dates not reported.                                                                                                                                                                                                                                  | Other                  | Unclear                                                                                                      | Unclear                                                          |
|                  | Fu, Yi et al.              | Wuhan Jin Yin-Tan Hospital, Zhongshan Hospital Xiamen University, the fifth Hospital of Wuhan, January 1 2015 to February 29.                                                                                                                                                               | Unclear                | Unclear                                                                                                      | Unclear                                                          |
|                  | Gozes, Frid-Adar et al.    | Covid-19 cases: chainz.cn registry (Chinese, January to February), a second dataset from Zhejiang Province, China with both cases and controls. Lung segmentation data from El Camino Hospital, California, and University Hospitals of Geneva (unclear whether these have covid-19 cases). | Unclear                | Unclear                                                                                                      | Unclear                                                          |
|                  | Imran, Posokhova, et al.   | Cough samples of unspecified origin.                                                                                                                                                                                                                                                        | Unclear                | Unclear                                                                                                      | Unclear                                                          |
|                  | Li, Zhu et al.             | The international Github image repository on covid-19, combined with controls from the Radiological Society of North America Kaggle data (2018).                                                                                                                                            | Nonnested case-control | Unclear                                                                                                      | Unclear                                                          |
|                  | Hassanien, Mahdy et al.    | The international Github image repository on covid-19, combined with controls from the Montgomery County X-ray Set.                                                                                                                                                                         | Unclear                | Unclear                                                                                                      | Unclear                                                          |
|                  | Tang, Zhao et al.          | Seven hospitals with different types of CT scanners, presumably Chinese.                                                                                                                                                                                                                    | Unclear                | 45 ± 17                                                                                                      | 55%                                                              |
|                  | Wang, Zha et al.           | Renmin Hospital of Wuhan University, Henan Provincial People's Hospital, the First Affiliated Hospital of Anhui Medical University, the First Hospital of China Medical University).                                                                                                        | Retrospective cohort   | Dev.: 51 ± 19<br>Val.: 49 ± 18; 58 ± 16                                                                      | Dev.: 48%<br>Val.: 58%; 67%                                      |
|                  | Zhang, Xie, et al.         | The international Github image repository on covid-19, combined with controls from the publically available Chestxray8 database (2017).                                                                                                                                                     | Nonnested case-control | Unclear                                                                                                      | Unclear                                                          |
|                  | Zhou, Chen et al.          | 8 centers in China, May 2015 to Feb 2020.                                                                                                                                                                                                                                                   | Nonnested case-control | Dev.: control: 71 (IQR 60 to 81), case: 49 (38 to 57);<br>Val.: control: 67 (IQR 60 to 79), case: 49 (35-63) | Dev.: control: 63%, case: 57%;<br>Val.: controll: 66%, case: 54% |
| <b>Prognosis</b> |                            |                                                                                                                                                                                                                                                                                             |                        |                                                                                                              |                                                                  |
|                  | Bai, Fang, et al.          | Wuhan Pulmonary Hospital, January 3 to February 13                                                                                                                                                                                                                                          | Retrospective cohort   | 53 ± 13                                                                                                      | 50%                                                              |
|                  | Caramelo, Ferreira, et al. | Simulated based on data from Wuhan, China, December 8 to February 11                                                                                                                                                                                                                        | Simulation             | Unclear                                                                                                      | 41%                                                              |
|                  | Gong, Ou, et al:           | Guangzhou Eighth People's Hospital, Zhongnan Hospital of Wuhan University, Third Affiliated Hospital of Sun Yat-sen University, January 20 to March 2                                                                                                                                       | Retrospective cohort   | Dev.: 49<br>Val.1: 52<br>Val.2: 42                                                                           | Dev.: 47%<br>Val.1: 44%<br>Val.2: 50%                            |
|                  | Lu, Hu, et al.             | Wuhan Hankou Hospital, January 21 to February 5                                                                                                                                                                                                                                             | Retrospective cohort   | Unclear                                                                                                      | 44%                                                              |
|                  | Qi, Jiang, et al.          | 5 hospitals from Ankang, Lishui, Zhenjiang, Lanzhou, Linxia between January 23 to February 8; date of last follow-up February 20                                                                                                                                                            | Prospective cohort     | 38 (IQR 26 to 47)                                                                                            | 55%                                                              |
|                  | Shi, Yu, et al.            | Hangzhou, Zhejiang Province, study dates unspecified, follow-up until February 17                                                                                                                                                                                                           | Retrospective cohort   | 46 ± 19                                                                                                      | 53%                                                              |
|                  | Xie, Hungerford, et al.    | Tongji Hospital and Jinyintan Hospital, admitted between January and February                                                                                                                                                                                                               | Retrospective cohort   | Tongji: 65 (IQR 54 to 73)<br>Jinyintan: 56 (IQR 47 to 68)                                                    | Tongji: 52%<br>Jinyintan: 35%                                    |

|  |                              |                                                                                                                                                           |                      |                                            |                             |
|--|------------------------------|-----------------------------------------------------------------------------------------------------------------------------------------------------------|----------------------|--------------------------------------------|-----------------------------|
|  | Yan, Zhang, et al.           | Tongji Hospital Wuhan, January 10 to February 18                                                                                                          | Retrospective cohort | 59 ± 16                                    | 59%                         |
|  | Yuan, Yin, et al.            | Hubei Public Health Clinical Centre; central Hospital of Wuhan, January 1 to January 25                                                                   | Retrospective cohort | 60 (IQR 47 to 69)                          | 44%                         |
|  | <i>Update 1:</i>             |                                                                                                                                                           |                      |                                            |                             |
|  | Huang, Cai et al.            | Guangzhou 8th People's Hospital, January 20 to February 29                                                                                                | Retrospective cohort | 45 ± 19                                    | 50%                         |
|  | Pourhomayoun, Shakibi et al. | Publicly available data on Github from nCov-2019 Data Working Group with confirmed cases worldwide (76 countries) in a variety of settings.               | Unclear              | 57 (mean)                                  | Unclear                     |
|  | Sakar, Chakrabarti           | Kaggle data with cases from 22 countries in Asia, Australia, Europe, North America, January 13 to February 28.                                            | Unclear              | Unclear                                    | Unclear                     |
|  | Wang, Zha et al.             | Renmin Hospital of Wuhan University, Henan Provincial People's Hospital, Beijing Youan Hospital of Capital Medical University, Huangshi Central Hospital) | Retrospective cohort | Dev. 51 ± 19; Val. 50 ± 19, 48 ± 14        | Dev. 48%; Val. 47%, 51%     |
|  | Zeng, Li et al.              | Third People's hospital of Shenzhen (Shenzhen, China) from January 11 to February 29                                                                      | Retrospective cohort | Severe: 58.7 (11), non-severe: 46.1 (14.1) | Severe: 62% non-severe: 44% |

\* The study also included a prospective validation cohort of 27 consecutive patients (11 with COVID-19 pneumonia)

**Supplementary Table 2.** Overview of modelling techniques for diagnosis and prognosis of COVID-19 infection.

| Study                                           | Outcome                                                    | Predictors in final model                                                                                                                                                                                                                                                                        | Modelling technique                                                                    |
|-------------------------------------------------|------------------------------------------------------------|--------------------------------------------------------------------------------------------------------------------------------------------------------------------------------------------------------------------------------------------------------------------------------------------------|----------------------------------------------------------------------------------------|
| <b>Hospital admission in general population</b> |                                                            |                                                                                                                                                                                                                                                                                                  |                                                                                        |
| Decaprio, Gartner, et al.                       | Hospital admission for COVID-19 pneumonia (proxy events)*1 | Age; sex; number of previous hospital admissions; 11 diagnostic features; interactions between age and diagnostic features                                                                                                                                                                       | Logistic regression                                                                    |
| Decaprio, Gartner, et al.                       | Hospital admission for COVID-19 pneumonia (proxy events)*1 | Age and 500+ features related to diagnosis history                                                                                                                                                                                                                                               | Tree-based (XGBoost)                                                                   |
| Decaprio, Gartner, et al.                       | Hospital admission for COVID-19 pneumonia (proxy events)*1 | 500+ undisclosed features, including age, diagnostic history, social determinants of health, Charlson comorbidity index                                                                                                                                                                          | Tree-based (XGBoost)                                                                   |
| <b>Diagnosis</b>                                |                                                            |                                                                                                                                                                                                                                                                                                  |                                                                                        |
| Feng, Huang, et al.                             | Suspected COVID-19 pneumonia                               | Age, temperature, heart rate, diastolic blood pressure, systolic blood pressure, basophil count, platelet count, mean corpuscular haemoglobin content, eosinophil count, monocyte count, fever, shiver, shortness of breath, headache, fatigue, sore throat, fever classification, interleukin-6 | Logistic regression (LASSO) (vs. Logistic regression (ridge), decision tree, Adaboost) |
| Lopez-Rincon, et al.                            | COVID-19 diagnosis                                         | Specific sequences of base pairs                                                                                                                                                                                                                                                                 | Neural net (deep convolutional neural network)                                         |
| Meng, Wang, et al.                              | COVID-19 diagnosis                                         | Age; activated partial thromboplastin time; red blood cell distribution width-CD; uric acid; triglyceride; serum potassium; albumin/globulin; 3-hydroxybutyrate; serum calcium                                                                                                                   | LASSO followed by logistic regression                                                  |
| Song, Xu, et al.                                | COVID-19 diagnosis                                         | Fever; history of close contact; signs of pneumonia on CT; neutrophil-to-lymphocyte ratio; highest body temperature; sex; (age, meaningful respiratory syndromes)                                                                                                                                | Logistic regression                                                                    |
| Yu, Shao, et al.                                | Severe disease (yes/no) defined based on clinical symptoms | Direct Bilirubin; Alanine transaminase                                                                                                                                                                                                                                                           | Tree-based (decision tree)                                                             |
| <i>Update 1:</i>                                |                                                            |                                                                                                                                                                                                                                                                                                  |                                                                                        |
| Martin, Nateqi, et al.                          | covid-19 diagnosis                                         | Unknown                                                                                                                                                                                                                                                                                          | Unclear                                                                                |
| Sun, Koh, et al.                                | covid-19 diagnosis                                         | Age; sex; temperature; heart rate; systolic blood pressure; diastolic blood pressure; sore throat                                                                                                                                                                                                | Logistic regression                                                                    |
| Sun, Koh, et al.                                | covid-19 diagnosis                                         | Sex; temperature; heart rate; respiration rate; diastolic blood pressure; sore throat; sputum production; shortness of breath; gastrointestinal symptoms; lymphocytes; neutrophils; eosinophils; creatinine                                                                                      | Logistic regression                                                                    |
| Sun, Koh, et al.                                | covid-19 diagnosis                                         | Sex; covid-19 case contact; travel to Wuhan; travel to China; temperature; heart rate; respiration rate; diastolic blood pressure; sore throat; sputum production; gastrointestinal symptoms; CXR/CT suggestive of pneumonia; neutrophils; eosinophils; creatinine; sodium                       | Logistic regression                                                                    |
| Sun, Koh, et al.                                | covid-19 diagnosis                                         | Sex; covid-19 case contact; travel to Wuhan; travel to China; temperature; heart rate; respiration rate; diastolic blood pressure; sore throat; sputum production; gastrointestinal symptoms; CXR/CT                                                                                             | Logistic regression                                                                    |

|                           |                           |                                                                                   |                                                                                                                                                                                                                             |                                                                                                                                              |
|---------------------------|---------------------------|-----------------------------------------------------------------------------------|-----------------------------------------------------------------------------------------------------------------------------------------------------------------------------------------------------------------------------|----------------------------------------------------------------------------------------------------------------------------------------------|
|                           |                           |                                                                                   | suggestive of pneumonia; neutrophils; eosinophils; creatinine; sodium                                                                                                                                                       |                                                                                                                                              |
|                           | Wang, Weng, et al.        | covid-19 pneumonia                                                                | epidemiological history, wedge-shaped or fan-shaped lesion parallel to or near the pleura, bilateral lower lobes, ground glass opacities, crazy paving pattern, WBC count                                                   | Logistic regression (LASSO)                                                                                                                  |
|                           | Wu, Zhang, et al.         | covid-19 diagnosis                                                                | Lactate dehydrogenase, calcium, creatinine, total protein, total bilirubin, basophil, platelet distribution width, kalium; magnesium; creatine kinase isoenzyme; glucose                                                    | Tree-based (random forest)                                                                                                                   |
|                           | Zhou, Yang, et al.        | severe covid-19 pneumonia                                                         | Age, sex, onset-admission time, high BP, diabetes, CHD, COPD, white blood cell counts, lymphocyte, neutrophils, alanine transaminase, aspartate aminotransferase, serum albumin, serum creatinine, blood urea nitrogen, CRP | Logistic regression                                                                                                                          |
| <b>Diagnostic imaging</b> |                           |                                                                                   |                                                                                                                                                                                                                             |                                                                                                                                              |
|                           | Barstugan, Ozkaya, et al  | COVID-19 diagnosis                                                                | Not applicable                                                                                                                                                                                                              | Support vector machine                                                                                                                       |
|                           | Chen, Wu, et al.          | COVID-19 pneumonia                                                                | Not applicable                                                                                                                                                                                                              | Neural net (Unet ++)                                                                                                                         |
|                           | Gozes, Frid-Adar, et al.  | COVID-19 diagnosis                                                                | Not applicable                                                                                                                                                                                                              | Neural net (deep convolutional neural network)                                                                                               |
|                           | Jin, Chen, et al.         | COVID-19 diagnosis                                                                | Not applicable                                                                                                                                                                                                              | Neural net (various segmentation and classification models)                                                                                  |
|                           | Jin, Wang, et al.         | COVID-19 pneumonia                                                                | Not applicable                                                                                                                                                                                                              | Neural net (convolutional neural network)                                                                                                    |
|                           | Li, Qin, et al.           | COVID-19 diagnosis                                                                | Not applicable                                                                                                                                                                                                              | Neural net (COVNet)                                                                                                                          |
|                           | Shan, Gao, et al.         | Segmentation and quantification of infection regions in lung from chest CT scans. | Not applicable                                                                                                                                                                                                              | Neural net (VB-Net)                                                                                                                          |
|                           | Shi, Xia, et al.          | COVID-19 pneumonia                                                                | 5 categories of location features from imaging: volume, number, histogram, surface, radiomics                                                                                                                               | LASSO followed by tree-based (infection size-aware random forest (iSARF) method vs. logistic regression, support vector machine, Neural net. |
|                           | Wang, Kang, et al.        | COVID-19 diagnosis                                                                | Not applicable                                                                                                                                                                                                              | Neural net (convolutional neural network)                                                                                                    |
|                           | Xu, Jiang, et al.         | COVID-19 diagnosis                                                                | Not applicable                                                                                                                                                                                                              | Neural net (convolutional neural network)                                                                                                    |
|                           | Ying, Zheng, et al.       | diagnosis of COVID-19 vs healthy controls                                         | Not applicable                                                                                                                                                                                                              | Neural net (DRENet vs. VGG16, DenseNet, ResNet for comparison)                                                                               |
|                           | Ying, Zheng, et al.       | diagnosis of COVID-19 vs bacterial pneumonia                                      | Not applicable                                                                                                                                                                                                              | Neural net (DRENet vs. VGG16, DenseNet, ResNet for comparison)                                                                               |
|                           | Zheng, Deng, et al.       | COVID19 diagnosis                                                                 | Not applicable                                                                                                                                                                                                              | Neural net (DeCovNet)                                                                                                                        |
|                           | <i>Update 1:</i>          |                                                                                   |                                                                                                                                                                                                                             |                                                                                                                                              |
|                           | Abbas, Abdelsamea, et al. | covid-19 diagnosis                                                                | Not applicable                                                                                                                                                                                                              | Neural net (convolutional neural network, DeTraC)                                                                                            |
|                           | Apostolopoulos, Mpesiana. | covid-19 diagnosis                                                                | Not applicable                                                                                                                                                                                                              | Neural net (extension of pretrained deep convolutional neural network MobileNetv2)                                                           |

|                  |                                |                                                                 |                                                                                                                                |                                                                                                                                                                              |
|------------------|--------------------------------|-----------------------------------------------------------------|--------------------------------------------------------------------------------------------------------------------------------|------------------------------------------------------------------------------------------------------------------------------------------------------------------------------|
|                  | Bukhari, Bukhari et al.        | covid-19 diagnosis                                              | Not applicable                                                                                                                 | Neural net (convolutional neural network ResNet-50)                                                                                                                          |
|                  | Chaganti, Balachandran, et al. | percentage lung opacity                                         | Not applicable                                                                                                                 | Neural net (deep reinforcement learning followed by DI2N; DenseUNet)                                                                                                         |
|                  | Chaganti, Balachandran, et al. | percentage high lung opacity                                    | Not applicable                                                                                                                 | Neural net (deep reinforcement learning followed by DI2N; DenseUNet)                                                                                                         |
|                  | Chaganti, Balachandran, et al. | Severity score                                                  | Not applicable                                                                                                                 | Neural net (deep reinforcement learning followed by DI2N; DenseUNet)                                                                                                         |
|                  | Chaganti, Balachandran, et al. | Long opacity score                                              | Not applicable                                                                                                                 | Neural net (deep reinforcement learning followed by DI2N; DenseUNet)                                                                                                         |
|                  | Chowdhury, Rahman et al.       | covid-19 vs 'normal' and viral pneumonia                        | Not applicable                                                                                                                 | Neural net (convolutional neural net SqueezeNet)                                                                                                                             |
|                  | Chowdhury, Rahman et al.       | covid-19 vs 'normal' and viral pneumonia                        | Not applicable                                                                                                                 | Neural net (convolutional neural net SqueezeNet)                                                                                                                             |
|                  | Fu, Yi et al.                  | covid-19 diagnosis                                              | Not applicable                                                                                                                 | Neural net (ResNet-50)                                                                                                                                                       |
|                  | Gozes, Frid-Adar et al.        | covid-19 diagnosis                                              | Not applicable                                                                                                                 | Neural net (U-net; ResNet-50)                                                                                                                                                |
|                  | Imran, Posokhova, et al.       | covid-19 diagnosis                                              | Not applicable                                                                                                                 | Ensemble of three methods (Deep Learning-based Multi Class classifier, Classical Machine Learning-based Multi Class classifier, Deep Learning-based Binary Class classifier) |
|                  | Li, Fang, et al.               | severe and critical covid-19 disease                            | Severity score based on CT scans                                                                                               | NA (external validation)                                                                                                                                                     |
|                  | Li, Zhu et al.                 | covid-19 disease                                                | Not applicable                                                                                                                 | Neural net (convolutional neural network DenseNet-121)                                                                                                                       |
|                  | Hassanien, Mahdy et al.        | covid-19 disease                                                | Not applicable                                                                                                                 | Support vector machine                                                                                                                                                       |
|                  | Tang, Zhao et al.              | covid-19 severe vs non-severe                                   | Not applicable                                                                                                                 | Tree-based (Random forest)                                                                                                                                                   |
|                  | Wang, Zha et al.               | covid-19 disease                                                | Not applicable                                                                                                                 | Neural net                                                                                                                                                                   |
|                  | Zhang, Xie, et al.             | covid-19 disease                                                | Not applicable                                                                                                                 | Neural net (extension of pretrained residual convolutional neural network)                                                                                                   |
|                  | Zhou, Chen et al.              | covid-19 diagnosis                                              | Not applicable                                                                                                                 | Neural net (DenseNet121-FPN, COVID-19Net)                                                                                                                                    |
| <b>Prognosis</b> |                                |                                                                 |                                                                                                                                |                                                                                                                                                                              |
|                  | Bai, Fang, et al.              | Deterioration into severe/critical disease (period unspecified) | Combination of demographics, signs and symptoms, laboratory results and features derived from CT images                        | Neural net (Multilayer perceptron + long short term memory vs. logistic regression, linear discriminant analysis, support vector machine, multilayer perceptron)             |
|                  | Caramelo, Ferreira, et al.     | Mortality (period unspecified) *2                               | Age; sex; presence of any comorbidity (hypertension, diabetes, cardiovascular disease, chronic respiratory disease, cancer) *3 | Logistic regression                                                                                                                                                          |

|                              |                                                 |                                                                                                                                     |                                                                                                                                                 |
|------------------------------|-------------------------------------------------|-------------------------------------------------------------------------------------------------------------------------------------|-------------------------------------------------------------------------------------------------------------------------------------------------|
| Gong, Ou, et al.             | Severe COVID-19 infection (minimum 15 day)      | Age, serum LDH, CRP, variation of red blood cell distribution width, blood urea nitrogen, albumin, direct bilirubin                 | LASSO followed by logistic regression (vs. LASSO followed by decision tree, random forest or support vector machine)                            |
| Lu, Hu, et al.               | Mortality (12 day)                              | Age; C-reactive protein                                                                                                             | Cox regression                                                                                                                                  |
| Qi, Jiang, et al.            | Hospital stay >10 days                          | 6 features derived from CT images *3                                                                                                | Logistic regression                                                                                                                             |
| Qi, Jiang, et al.            | Hospital stay >10 days                          | 6 features derived from CT images *3                                                                                                | Tree-based (random forest)                                                                                                                      |
| Shi, Yu, et al.              | Death or severe COVID-19 (period unspecified)   | Age (dichotomized); sex; hypertension                                                                                               | Multivariate model (not specified)                                                                                                              |
| Xie, Hungerford, et al.      | Mortality (in hospital)                         | Age, LDH, lymphocyte count, SPO2                                                                                                    | Logistic regression                                                                                                                             |
| Yan, Zhang, et al.           | Mortality (period unspecified)                  | Lactic dehydrogenase; lymphocyte count; high-sensitivity C-reactive protein                                                         | Tree-based (XGBoost)                                                                                                                            |
| Yuan, Yin, et al.            | Mortality (period unspecified)                  | Clinical scorings of CT images (zone, left/right, location, attenuation, distribution of affected parenchyma)                       | NA (external validation)                                                                                                                        |
| <i>Update 1:</i>             |                                                 |                                                                                                                                     |                                                                                                                                                 |
| Huang, Cai et al.            | severe symptoms 3 days after admission          | Underlying diseases; fast respiratory rate >24/min; elevated CRP-level (> 10mg/dL); elevated lactate dehydrogenase level (> 250U/L) | Logistic regression                                                                                                                             |
| Pourhomayoun, Shakibi et al. | in-hospital mortality (period unspecified)      | Unknown                                                                                                                             | Neural net (Neural Networks vs. Support Vector Machine (SVM), Random Forest, Decision Tree, Logistic Regression, and K-Nearest Neighbour (KNN)) |
| Sakar, Chakrabarti           | death vs recovery (period unspecified)          | Age, days from symptom onset to hospitalisation, from Wuhan, sex, visit to Wuhan                                                    | Tree-based (Random forest)                                                                                                                      |
| Wang, Zha et al.             | length of hospital stay                         | Age and CT features                                                                                                                 | Cox regression                                                                                                                                  |
| Zeng, Li et al.              | severe disease progression (period unspecified) | CT features                                                                                                                         | LASSO followed by Fine and Gray                                                                                                                 |
| Zeng, Li et al.              | severe disease progression (period unspecified) | CT features and laboratory markers                                                                                                  | LASSO followed by Fine and Gray                                                                                                                 |

\*1 Proxy events used: pneumonia (except from TB), influenza, acute bronchitis, or other specified upper respiratory infections (no COVID-19 pneumonia cases in data).

\*2 Outcome and predictor data were simulated.

\*3 Wavelet-HLH\_gldm\_SmallDependenceLowGrayLevelEmphasis, wavelet-LHH\_gldm\_Correlation, wavelet-LHL\_glszm\_GrayLevelVariance, wavelet-LLH\_glszm\_SizeZoneNonUniformityNormalized, wavelet-LLH\_glszm\_SmallAreaEmphasis, wavelet-LLH\_gldm\_Correlation.
